# Supplementary material for: Late-stage differentiation of embryonic pancreatic β-cells requires Jarid2
Source: PubMed Central journal article supplement (PMC5599523; doi:10.1038/s41598-017-11691-2), 2017-09-14
Supplement: 41598_2017_11691_MOESM1_ESM.pdf [file 41598_2017_11691_MOESM1_ESM.pdf]

## Late-stage differentiation of embryonic pancreatic $\beta$ -cells requires Jarid2

Sara Cervantes<sup>1,2,\*</sup>, Marta Fontcuberta-Pi Sunyer<sup>1,2,3</sup>, Joan-Marc Servitja<sup>1,2</sup>, Rebeca Fernandez-Ruiz<sup>1,2</sup>, Ainhoa García<sup>1,2</sup>, Lidia Sanchez<sup>1,2</sup>, Young-Sook Lee<sup>4</sup>, Ramon Gomis<sup>1,2,5,6</sup>, Rosa Gasa<sup>1,2,\*</sup>

<sup>1</sup> Diabetes and Obesity Research Laboratory, August Pi i Sunyer Biomedical Research Institute (IDIBAPS), Rosselló 149-153, 08036 Barcelona, Spain

<sup>2</sup> Centro de Investigación Biomédica en Red de Diabetes y Enfermedades Metabólicas Asociadas (CIBERDEM), Spain

<sup>3</sup> University of Barcelona, Barcelona, Spain

<sup>4</sup> Department of Cellular and Regenerative Biology, University of Wisconsin-Madison, Madison, Wisconsin 53706, USA.

<sup>5</sup> Department of Endocrinology and Nutrition, Hospital Clinic of Barcelona, Barcelona, Spain

<sup>6</sup> Department of Medicine, University of Barcelona, Barcelona, Spain

\* Corresponding authors

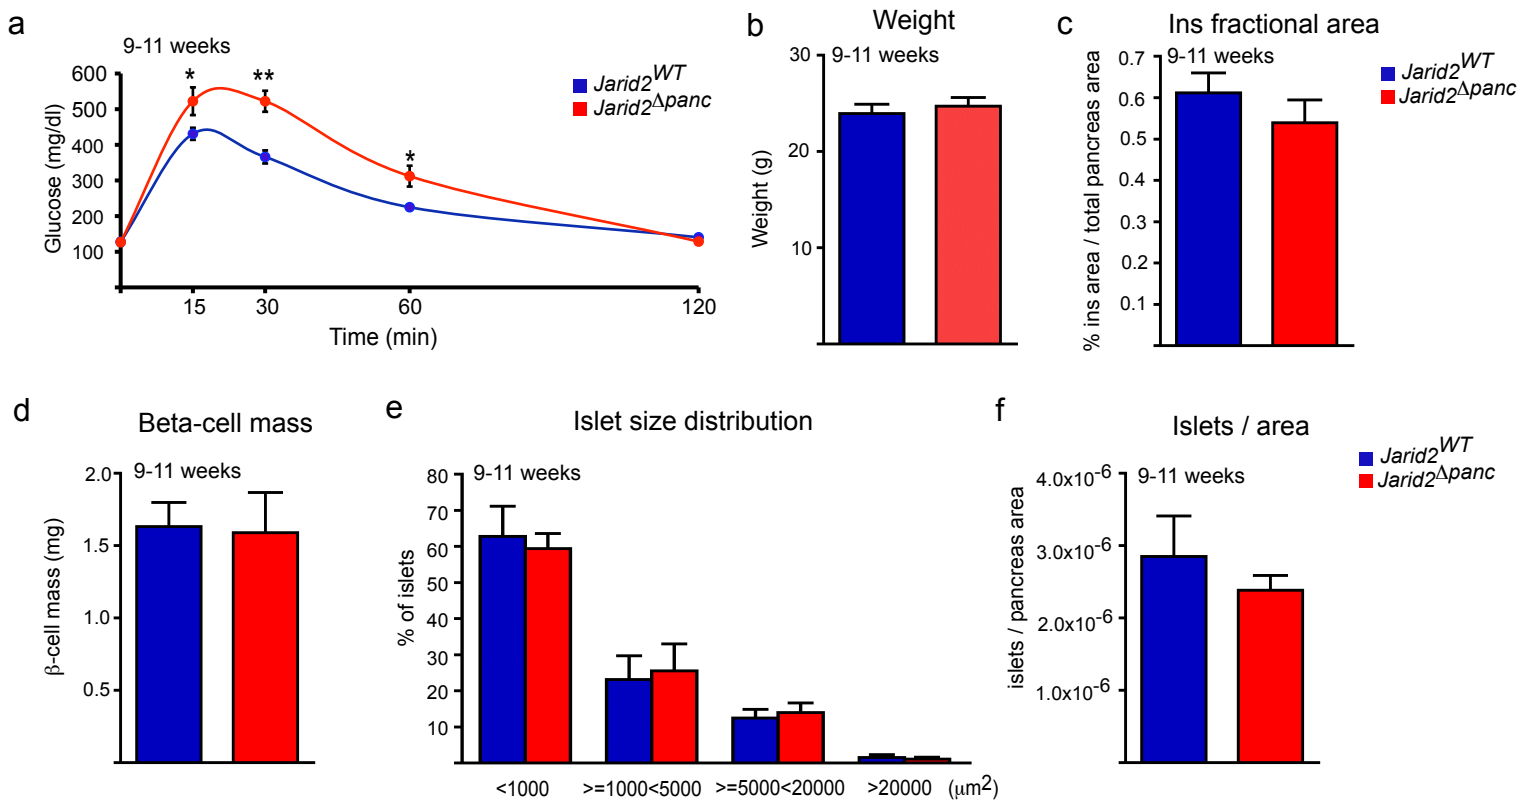

**Figure S1. Ablation of *Jarid2* in pancreatic progenitors results in glucose intolerance in adult mice.** (a) Intraperitoneal Glucose Tolerance Test (ipGTT) in 9-11 week-old *Jarid2<sup>WT</sup>* (n=8) and *Jarid2<sup>Δpanc</sup>* (n=9) male mice were performed after 5-6 hrs of fasting. Each datapoint represents mean ± SEM. \*P<0.05, \*\*P<0.001. (b) Body weight of 9-11 week-old *Jarid2<sup>WT</sup>* (n=8) and *Jarid2<sup>Δpanc</sup>* (n=9) male mice after 5-6 hrs of fasting. Bars represent mean ± SEM. (c-f) Pancreas from 12 week-old *Jarid2<sup>WT</sup>* (n=3) and *Jarid2<sup>Δpanc</sup>* (n=3) were harvested, fixed, sectioned and immuno-stained for insulin: (c) Fractional insulin-positive area (relative to total pancreatic area); (d) Beta cell mass (fractional insulin-positive area x pancreas weight); (e) Islet size distribution, expressed as percentage of total islets; (f) Number of islets per pancreatic area. Bars represent mean ± SEM. Similar results were obtained with pancreas from adult females (data not shown).

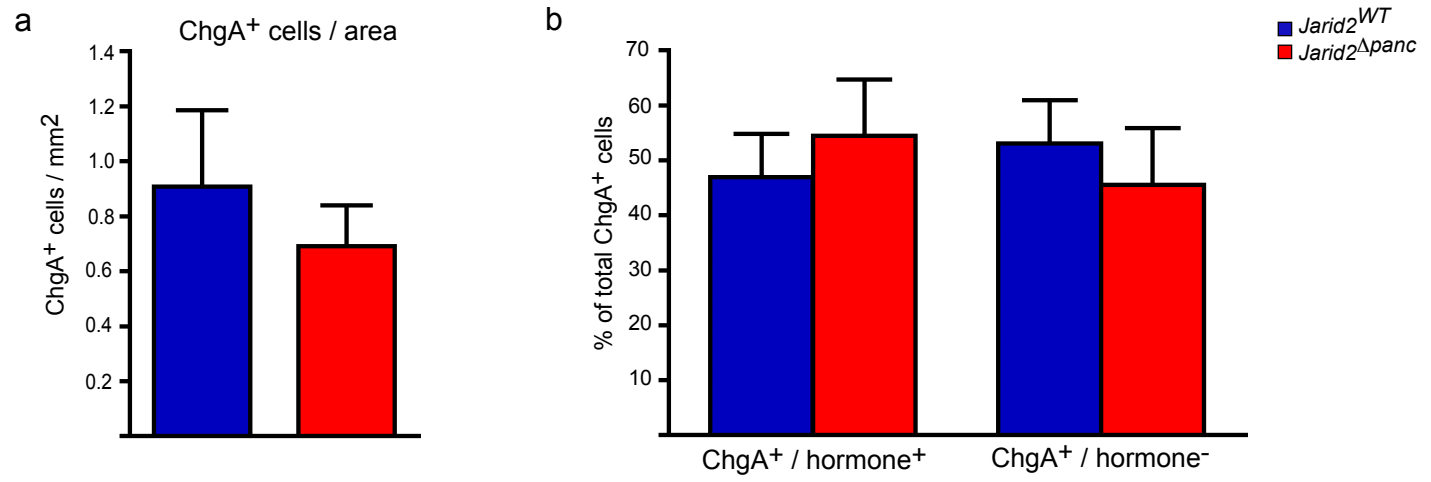

**Figure S2. Ablation of Jarid2 in pancreatic progenitors does not impair endocrine cell commitment.** Pancreas from e15.5 *Jarid2*<sup>WT</sup> (n=3) and *Jarid2*<sup>Δpanc</sup> (n=3) embryos were harvested, fixed, sectioned and immunostained for Chromogranin A (ChgA), Pdx1, insulin and glucagon. (a) Number of ChgA<sup>+</sup> cells per Pdx1<sup>+</sup> (epithelial) area analyzed. (b) Percentage of total number of ChgA<sup>+</sup> cells that were hormone<sup>+</sup> (insulin and glucagon) or hormone<sup>-</sup>. Note that there were no differences in either population between *Jarid2*<sup>Δpanc</sup> and *Jarid2*<sup>WT</sup>. Bars represent mean ± SEM

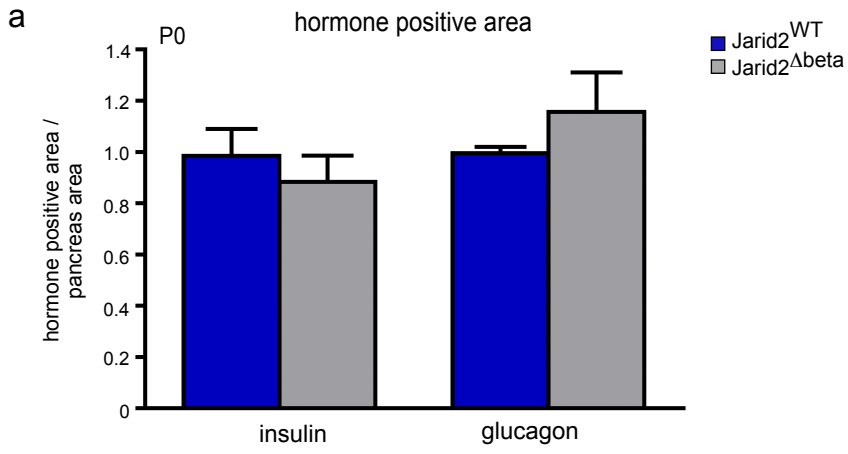

**Figure S3. Ablation of Jarid2 in beta cells does not result in defects in insulin or glucagon positive cell area in newborn mice.** Morphometric analysis of *Jarid2*<sup>WT</sup> (n=3) and *Jarid2*<sup>Δbeta</sup> (n=3) insulin and glucagon positive area in newborn mice (P0). Bars represent mean ± SEM.

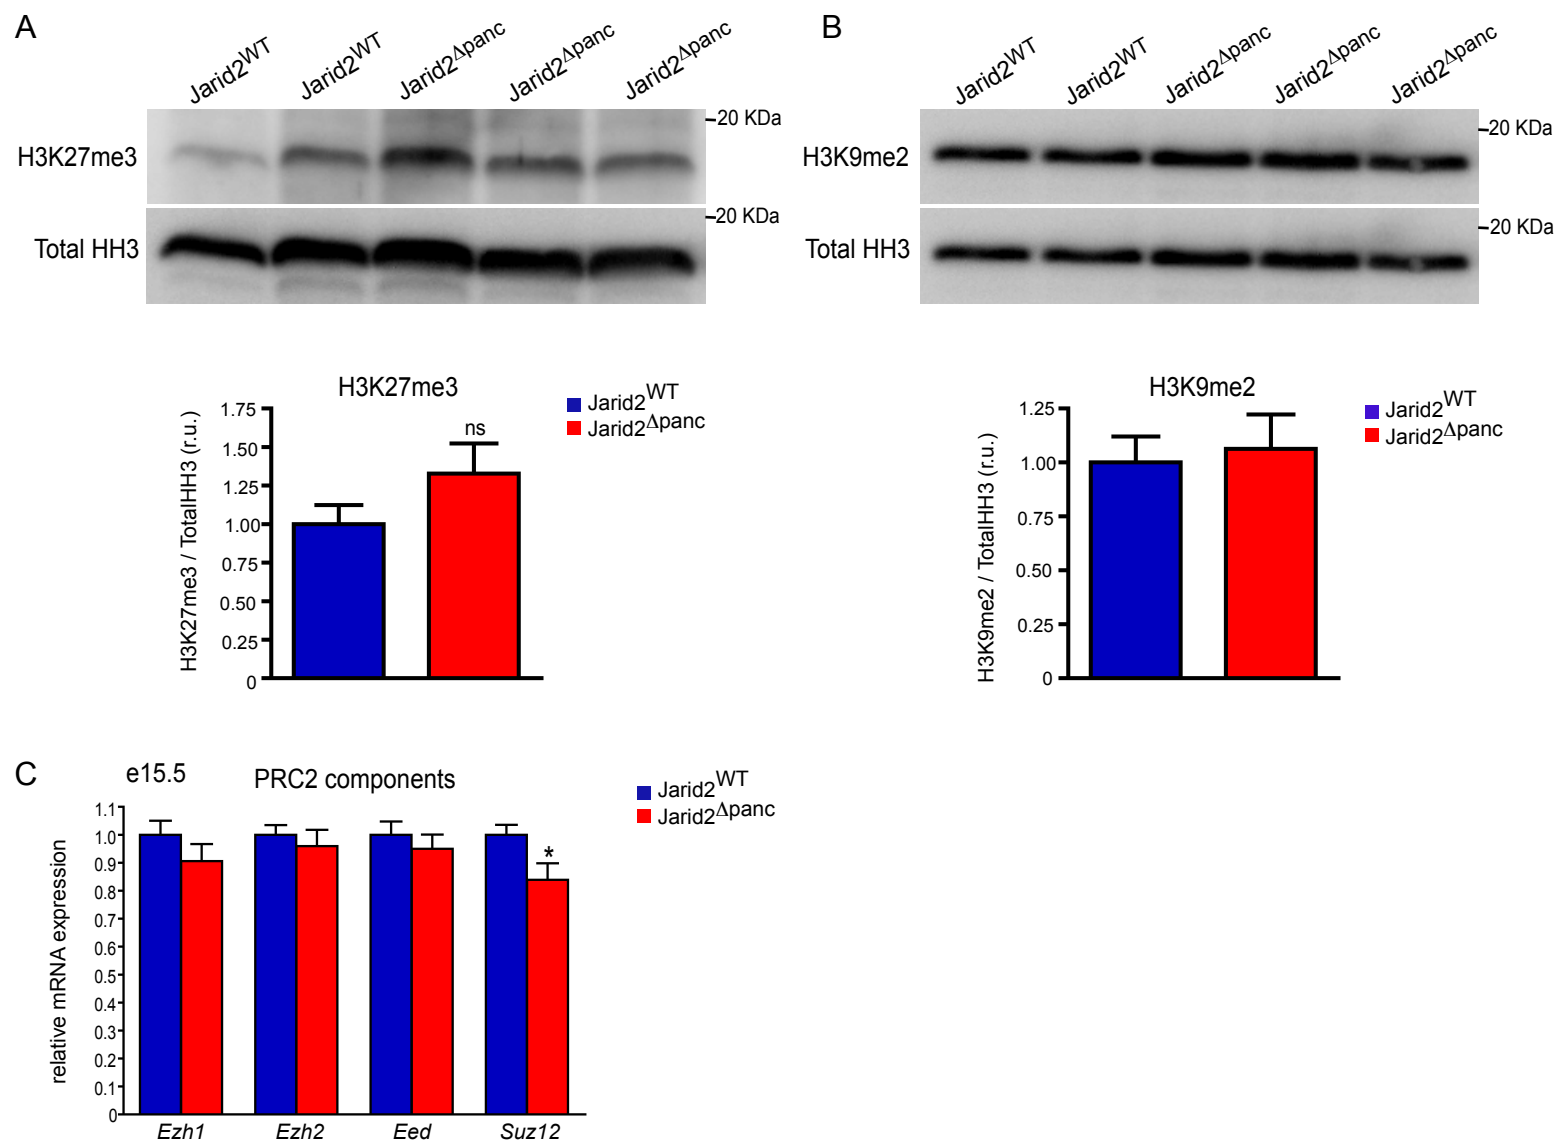

**Figure S4. Lack of major changes in H3K27me3 and H3K9me2 in the absence of Jarid2**

(a) Quantification by Western blot of H3K27me3 levels in total pancreatic lysates from individual e15.5 *Jarid2*<sup>WT</sup> (n=10) and *Jarid2*<sup>Δpanc</sup> (n=8) embryonic pancreas. A representative image is shown. Total Histone H3 was used as loading control. Bars represent mean ± SEM. (b) Quantification by Western blot of H3K9me2 levels in total pancreatic lysates from individual e15.5 *Jarid2*<sup>WT</sup> (n=4) and *Jarid2*<sup>Δpanc</sup> (n=3) embryonic pancreas. A representative image is shown. Total Histone H3 was used as loading control. Bars represent mean ± SEM. (c) Quantification by qRT-PCR of the relative expression of the PRC2 core components *Ezh1*, *Ezh2*, *Eed* and *Suz12* at e15.5 in *Jarid2*<sup>WT</sup> (n=11) and *Jarid2*<sup>Δpanc</sup> (n=15) embryonic pancreas. Bars represent mean ± SEM. \*P<0.05

**Table S1. Endocrine gene expression.**Comparison of expression of selected endocrine genes in pancreases from *Jarid2*<sup>Δpanc</sup> and control embryos at E15.5.

ND= Not determined.

| Probe Set ID | Gene Title                                                               | Gene Symbol    | Significantly changed by qPCR | logFC | P.Value | adj.P.Val | logFC BEST Ngn3-YFP | P.Value | adj.P.Val |
|--------------|--------------------------------------------------------------------------|----------------|-------------------------------|-------|---------|-----------|---------------------|---------|-----------|
| 1421112_at   | NK2 transcription factor related, locus 2 (Drosophila)                   | <b>Nkx2-2</b>  | NO                            | 0,0   | 0,79    | 0,96      | 4,38                | 2,3E-08 | 1,6E-05   |
| 1457613_at   | ---                                                                      | <b>Rfx6</b>    | NO                            | -0,1  | 0,63    | 0,92      | 4,36                | 8,8E-09 | 1,0E-05   |
| 1425828_at   | NK6 homeobox 1                                                           | <b>Nkx6-1</b>  | NO                            | 0,1   | 0,60    | 0,91      | 3,45                | 1,2E-05 | 5,9E-04   |
| 1450042_at   | aristales related homeobox                                               | <b>Arx</b>     | ND                            | -0,1  | 0,44    | 0,86      | 5,62                | 7,5E-10 | 2,7E-06   |
| 1450723_at   | ISL1 transcription factor, LIM/homeodomain                               | <b>Isl1</b>    | ND                            | -0,2  | 0,14    | 0,71      | 3,55                | 2,3E-07 | 6,3E-05   |
| 1422773_at   | myelin transcription factor 1                                            | <b>Myt1</b>    | ND                            | -0,2  | 0,14    | 0,70      | 4,42                | 2,1E-08 | 1,6E-05   |
| 1430353_at   | GLIS family zinc finger 3                                                | <b>Glis3</b>   | ND                            | -0,1  | 0,10    | 0,65      | 2,36                | 5,0E-06 | 3,5E-04   |
| 1451598_at   | paired box gene 4                                                        | <b>Pax4</b>    | NO                            | -0,2  | 0,09    | 0,64      | 4,24                | 7,8E-10 | 2,7E-06   |
| 1415885_at   | chromogranin B                                                           | <b>Chgb</b>    | NO                            | -0,2  | 0,08    | 0,63      | 5,19                | 3,9E-07 | 7,9E-05   |
| 1418149_at   | chromogranin A                                                           | <b>Chga</b>    | NO                            | -0,2  | 0,06    | 0,60      | 5,50                | 1,9E-09 | 4,4E-06   |
| 1422312_a_at | neurogenin 3                                                             | <b>Neurog3</b> | NO                            | -0,2  | 0,02    | 0,50      | 3,15                | 1,9E-07 | 5,5E-05   |
| 1448676_at   | calcium/calmodulin-dependent protein kinase II, beta                     | <b>Camk2b</b>  | ND                            | -0,2  | 0,05    | 0,58      | 2,39                | 4,1E-05 | 1,3E-03   |
| 1419271_at   | paired box gene 6                                                        | <b>Pax6</b>    | YES                           | -0,3  | 0,05    | 0,58      | 6,17                | 1,5E-08 | 1,4E-05   |
| 1455865_at   | insulinoma-associated 1                                                  | <b>Insm1</b>   | YES                           | -0,2  | 0,03    | 0,51      | 5,45                | 7,7E-09 | 1,0E-05   |
| 1420440_at   | pancreatic polypeptide                                                   | <b>Ppy</b>     | ND                            | -0,3  | 0,02    | 0,47      | 4,99                | 5,8E-08 | 2,7E-05   |
| 1426412_at   | neurogenic differentiation 1                                             | <b>Neurod1</b> | YES                           | -0,4  | 0,01    | 0,41      | 5,78                | 2,6E-10 | 2,3E-06   |
| 1425952_a_at | glucagon                                                                 | <b>Gcg</b>     | YES                           | -0,5  | 0,00    | 0,32      | 3,73                | 3,6E-06 | 2,9E-04   |
| 1448980_at   | ghrelin                                                                  | <b>Ghrl</b>    | ND                            | -0,4  | 0,00    | 0,25      | 4,31                | 4,2E-06 | 3,2E-04   |
| 1421396_at   | proprotein convertase subtilisin/kexin type 1                            | <b>Pcsk1</b>   | YES                           | -0,6  | 0,00    | 0,24      | 5,58                | 1,2E-07 | 4,4E-05   |
| 1423529_at   | glucose-6-phosphatase, catalytic, 2                                      | <b>G6pc2</b>   | YES                           | -1,1  | 0,00    | 0,21      | 5,37                | 1,7E-10 | 2,3E-06   |
| 1451716_at   | v-maf musculoaponeurotic fibrosarcoma oncogene family, protein B (avian) | <b>Mafb</b>    | YES                           | -0,5  | 0,00    | 0,20      | 4,50                | 1,0E-08 | 1,1E-05   |
| 1448628_at   | secretogranin III                                                        | <b>Scg3</b>    | ND                            | -0,7  | 0,00    | 0,14      | 5,55                | 6,2E-08 | 2,8E-05   |
| 1436092_at   | ---                                                                      | <b>Mafa</b>    | YES                           | -1,0  | 0,00    | 0,14      | 5,98                | 5,6E-09 | 9,6E-06   |
| 1460081_at   | synaptotagmin VII                                                        | <b>Syt7</b>    | ND                            | -0,5  | 0,00    | 0,14      | 4,99                | 4,7E-08 | 2,4E-05   |
| 1423506_a_at | neuronatin                                                               | <b>Nnat</b>    | ND                            | -0,4  | 0,00    | 0,13      | 3,53                | 4,6E-06 | 3,4E-04   |

|              |                                                                     |                |     |      |      |      |      |         |         |
|--------------|---------------------------------------------------------------------|----------------|-----|------|------|------|------|---------|---------|
| 1417954_at   | somatostatin                                                        | <b>Sst</b>     | YES | -0,6 | 0,00 | 0,12 | 5,44 | 8,4E-07 | 1,2E-04 |
| 1444027_at   | solute carrier family 30 (zinc transporter), member 8               | <b>Slc30a8</b> | ND  | -1,2 | 0,00 | 0,11 | 5,18 | 4,1E-08 | 2,2E-05 |
| 1435064_a_at | transmembrane protein 27                                            | <b>Tmem27</b>  | ND  | -0,5 | 0,00 | 0,11 | 5,26 | 2,6E-08 | 1,6E-05 |
| 1450708_at   | secretogranin II                                                    | <b>Scg2</b>    | ND  | -0,8 | 0,00 | 0,09 | 5,83 | 2,3E-08 | 1,6E-05 |
| 1422447_at   | insulin I                                                           | <b>Ins1</b>    | YES | -0,9 | 0,00 | 0,08 | 4,47 | 1,6E-08 | 1,5E-05 |
| 1448312_at   | proprotein convertase subtilisin/kexin type 2                       | <b>Pcsk2</b>   | ND  | -0,6 | 0,00 | 0,04 | 5,87 | 5,4E-11 | 2,3E-06 |
| 1422446_x_at | insulin II                                                          | <b>Ins2</b>    | YES | -0,9 | 0,00 | 0,03 | 3,86 | 9,4E-06 | 5,0E-04 |
| 1419127_at   | neuropeptide Y                                                      | <b>Npy</b>     | YES | -1,2 | 0,00 | 0,03 | 4,35 | 5,4E-07 | 9,4E-05 |
| 1417988_at   | regulated endocrine-specific protein 18                             | <b>Resp18</b>  | ND  | -0,8 | 0,00 | 0,02 | 4,57 | 9,8E-08 | 3,7E-05 |
| 1437323_a_at | islet amyloid polypeptide                                           | <b>Iapp</b>    | YES | -1,1 | 0,00 | 0,02 | 5,24 | 9,0E-09 | 1,0E-05 |
| 1426225_at   | retinol biNDing protein 4, plasma                                   | <b>Rbp4</b>    | ND  | 0,0  | 0,79 | 0,96 | 4,71 | 1,1E-07 | 4,2E-05 |
| 1449067_at   | solute carrier family 2 (facilitated glucose transporter), member 2 | <b>Slc2a2</b>  | YES | -0,1 | 0,44 | 0,85 | 5,26 | 7,0E-09 | 1,0E-05 |
| 1422330_at   | glucagon-like peptide 1 receptor                                    | <b>Glp1r</b>   | ND  | -0,1 | 0,33 | 0,81 | 0,15 | 4,9E-01 | 7,7E-01 |
| 1419146_a_at | glucokinase                                                         | <b>Gck</b>     | YES | 0,2  | 0,15 | 0,71 | 3,47 | 1,4E-09 | 4,2E-06 |

**Table S2. List of oligonucleotides**

| <b>GENE</b>         | <b>SEQUENCE</b>                                                    | <b>APPLICATION</b>   |
|---------------------|--------------------------------------------------------------------|----------------------|
| <i>Actb</i>         | 5' TGAGAGGGAAATCGTGCGTG<br>3' TGCTTGCTGATCCACATCTGC                | RT-PCR               |
| <i>Actb prox</i>    | 5' AACAAAGAGGCCACACAAATAGG<br>3' ACCCTCTGGGTGTGGATGTC              | ChIP-qPCR            |
| <i>Amy</i>          | 5' TGGCGTCAAATCAGGAACATG<br>3' AAAGTGGCTGACAAAGCCCAG               | qRT-PCR              |
| <i>Ccna2</i>        | 5' CGACGGGTTGCTCCTCTTA<br>3' CTGAGTCTCTTCTGCTTCATCC                | qRT-PCR              |
| <i>Ccnd1</i>        | 5' GCGTACCCTGACACCAATCTC<br>3' CTCCTCTTCGCACTTCTGCTC               | qRT-PCR              |
| <i>Ccnd2</i>        | 5' GCCAAGATCACCCACACTGATG<br>3' TCCGGCGTTATGCTGCTCT                | qRT-PCR              |
| <i>Ccnd3</i>        | 5' CGAGCCTCCTACTTCCAGTG<br>3' GGACAGGTAGCGATCCAGGT                 | qRT-PCR              |
| <i>Cdkn1a</i>       | 5' CCTGGTGATGTCCGACCTG<br>3' CCATGAGCGCATCGCAATC                   | qRT-PCR              |
| <i>Cdkn1b</i>       | 5' ATGAGGAAGCGACCTGCT<br>3' CCACAGTGCCAGCGTTC                      | qRT-PCR              |
| <i>Cdkn1c</i>       | 5' AGCAGGACGAGAATCAAGAG<br>3' GAAGAAGTCGTTCCGATTGG                 | qRT-PCR              |
| <i>Cdk4</i>         | 5' ATCAAGGTCACCCTAGTGTTTG<br>3' AGAAACTGACGCATTAGATCCTTA           | qRT-PCR              |
| <i>Cdk6</i>         | 5' AGTGCAGACCAGTGAGGA<br>3' CAACCTGACCACGTTGGG                     | qRT-PCR              |
| <i>Chga</i>         | 5' AGGGGACACCAAGGTGATGA<br>3' AGCAGATTCTGGTGTCGAG                  | qRT-PCR              |
| <i>Chgb</i>         | 5' GAATTGGGGATATGAGAAGAGAAGC<br>3' AGATCCATCGCAGCCAAGTTC           | qRT-PCR              |
| <i>Cre</i>          | 5' TGCCACGACCAAGTGACAGC<br>3' CCAGGTTACGGATATAGTTCATG              | genotyping           |
| <i>Eed</i>          | 5' GCGATGGTTAGGCGATTTGAT<br>3' TTTTGCCAGGTTTCCAGCAT                | qRT-PCR              |
| <i>Ezh1</i>         | 5' GGGCCTCCAGTTCCTCAGAGGCT<br>3' TCCGGTCCATTCCACCGGCT              | qRT-PCR              |
| <i>Ezh2</i>         | 5' GCGGGACTAGGGAGTGTTCA<br>3' AGGGTCTTTAACGGGATGACTTG              | qRT-PCR              |
| <i>FoxM1</i>        | 5' TGAGGGTCAAAGCTTGCAT<br>3' TCTGATGTTTCACTCGGGG                   | qRT-PCR              |
| <i>G6pc2</i>        | 5' CAGGAGGACTACCGGACTTAC<br>3' TCAACTGAAACCAAAGTGGGAA              | qRT-PCR<br>ChIP-qPCR |
| <i>Gcg</i>          | 5' AGGAATTCATTGCGTGGCTG<br>3' CAATGGCGACTTCTTCTGGG                 | qRT-PCR              |
| <i>lapp</i>         | 5' CTCCAAACTGGCAGGTGTCC<br>3' TCCGTTTGTCCATCTGAGGG                 | qRT-PCR              |
| <i>IL-2</i>         | 5' CCAGGTTACGGATATAGTTCATG<br>3' GTA GGT GGA AAT TCT AGC ATC ATC C | genotyping (control) |
| <i>Ins1 prox</i>    | 5' TGACCAATGAGTGGGCTACG<br>3' ATGAGATCCCAGCTCACCCCT                | ChIP-qPCR            |
| <i>Ins1+2</i>       | 5' AGCGTGGCTTCTTCTACACACC<br>3' CCAGCTCCAGTTGTGCCACT               | qRT-PCR              |
| <i>Insm1 prox</i>   | 5' CTTTATTCCGCAGCGCCTTG<br>3' GAGCGGGCATTGTTGCTGTG                 | ChIP-qPCR            |
| <i>Insm1</i>        | 5' CTGGCGGCGTATCCGAATC<br>3' CCTGGCGACGGAATTCTT                    | qRT-PCR              |
| <i>Jarid2 exon3</i> | 5' AGGCCTTGCCGGGAGCCTGAA<br>3' AGCAAAGGCTCCACTATCTTC               | qRT-PCR              |
| <i>Jarid2 3'</i>    | 5' GCACTTGTGCTACCTGTCCA<br>3' GCCAGACACTTTGCCACATA                 | qRT-PCR              |
| <i>Jarid2 flox</i>  | 5' GCGGTAAATGGTGAGTTGAAA<br>3' ACAGACTGACACACCTTCC                 | genotyping           |
| <i>Ki67</i>         | 5' CAGCTCCTGCCTGTTTGGAA<br>3' TTGCCTCTTGCTCTTTGACTTCA              | qRT-PCR              |



|                        |                                                                                                                       |            |
|------------------------|-----------------------------------------------------------------------------------------------------------------------|------------|
| <i>MafA</i>            | 5' CAAGGAGGAGGTCATCCGAC<br>3' TCTCCAGAATGTGCCGCTG                                                                     | qRT-PCR    |
| <i>MafA prox</i>       | 5' GTCACCGGTGTCAGGATAGT<br>3' GGGTACTCCTTCGGTGTCTC                                                                    | ChIP-qPCR  |
| <i>MafB</i>            | 5' TGGATGGCGAGCAACTACC<br>3' CCAGGTCATCGTGAGTCACA                                                                     | qRT-PCR    |
| <i>MyoD prox</i>       | 5' CATTGTCCCGTAGCCTTGAG<br>3' GCCACACGCGGTAGCACTTG                                                                    | ChIP-qPCR  |
| <i>NeuroD1</i>         | 5' GGATCAATCTTCTCTTCCGGTG<br>3' TGCGAATGGCTATCGAAAGAC                                                                 | qRT-PCR    |
| <i>NeuroD1 prox</i>    | 5' CCACAAAGGGTTAATCTCTCC<br>3' CGTCCAGACTGAACGACTCC                                                                   | ChIP-qPCR  |
| <i>Neurog3 (mouse)</i> | 5' TTCTCATCGGTACCCTTGCTG<br>3' GCAGACTCACCAGGAAGTATGG                                                                 | qRT-PCR    |
| <i>Nkx2-2</i>          | 5' GCCTCCAATACTCCCTGCAC<br>3' GTCATTGTCCGGTGACTCGT                                                                    | qRT-PCR    |
| <i>Nkx6-1</i>          | 5' TGGACAGCAAATCTTCGCCCTG<br>3' TGTTGTAATCGTCGTCATCCTC                                                                | qRT-PCR    |
| <i>Pak3</i>            | 5' CCATGTGCACACCTCTGACT<br>3' TCACCTGATGGCAGCTTCTG                                                                    | qRT-PCR    |
| <i>Pax4</i>            | 5' GAGTACCCTGCTCTTTTGCC<br>3' ACTCGATTGATAGAGGACACACT                                                                 | qRT-PCR    |
| <i>Pax6</i>            | 5' TACCAGTGTCTACCAGCCAAT<br>3' TGCACGAGTATGAGGAGGTCT                                                                  | qRT-PCR    |
| <i>PCNA</i>            | 5' ATCGTGAATCGGGGG<br>3' AACATGGTGGCGGA                                                                               | qRT-PCR    |
| <i>Pcsk1 prox</i>      | 5' TTAATGAAACTTGCCACCTCCC<br>3' ACCCCAGATCATTGGAGCCC                                                                  | ChIP-qPCR  |
| <i>Pcsk1</i>           | 5' TTAATGAAACTTGCCACCTCCC<br>3' ACCCCAGATCATTGGAGCCC                                                                  | qRT-PCR    |
| <i>Pdx1</i>            | 5' CCCAGTTTACAAGCTCGCT<br>3' CTCGGTTCATTTCGGGAAAGG                                                                    | qRT-PCR    |
| <i>Rfx6</i>            | 5' CCTTAGTAATGCAGGAGCTGGC<br>3' TCCAAGCCTATGTGCCTCTGA                                                                 | qRT-PCR    |
| <i>Ripply3</i>         | 5' TGAGTCTTGGGGAGACCAAC<br>3' AGAAATGAATGGTGGCTTGC                                                                    | qRT-PCR    |
| <i>R26-YFP</i>         | 5' AAAGTCGCTCTGAGTTGTTAT<br>3' GCGAAGAGTTTGTCTCAACC<br>GGAGCGGGAGAAATGGATATG                                          | genotyping |
| <i>Sst</i>             | 5' ACCCCAGACTCCGTCAGTTTC<br>3' ATCATTCTCTGTCTGGTTGGGC                                                                 | qRT-PCR    |
| <i>Sst prox</i>        | 5' GATGCCTCTGCTCTTCCAAC<br>3' CACAGGAGGGAGGGGGAGAA                                                                    | ChIP-qPCR  |
| <i>Suz12</i>           | 5' GAAGCTGTGGAACCTCCATGTC<br>3' ACAGCATAACAGGCATGATTCATTT                                                             | qRT-PCR    |
| <i>Tbp</i>             | 5' ACCCTTCACCAATGACTCCTATG<br>3' ATGATGACTGCAGCAAATCGC                                                                | qRT-PCR    |
| <i>tdTomato</i>        | 5' WT AAGGGAGCTGCAGTGGAGTA<br>3' WT CCGAAAATCTGTGGGAAGTC<br>5' mut CTGTTCCCTGTACGGCATGG<br>3' mut GGCATTAAGCAGCGTATCC | genotyping |

**Table S3. List of antibodies**

WB: western blot; IF: immunofluorescence; ChIP

| PRIMARY ANTIBODIES | RAISED IN  | DILUTION                           | SOURCE                                                   |
|--------------------|------------|------------------------------------|----------------------------------------------------------|
| amylase            | rabbit     | 1:200 (IF)                         | Sigma-Aldrich, St Louis, MO, USA                         |
| chromograninA      | rabbit     | 1:200 (IF)                         | Thermo Scientific                                        |
| Foxa2              | goat       | 1:100                              | Santa Cruz Biotechnologies                               |
| GFP                | chicken    | 1:200 (IF)                         | Abcam, Cambridge, UK                                     |
| glucagon           | mouse      | 1:500-1:1000 (IF)                  | Sigma-Aldrich                                            |
| insulin            | guinea pig | 1:500-1:1000 (IF)                  | DAKO, Glostrup, Denmark                                  |
| insulin            | rabbit     | 1:500-1:1000 (IF)                  | Santa Cruz Biotechnologies                               |
| Ki67               | rabbit     | 1: 200 (IF)                        | Thermo Scientific                                        |
| Muc-1              | rabbit     | 1:200 (IF)                         | Santa Cruz Biotechnologies                               |
| neurogenin3        | mouse      | 1:2000 (IF)                        | Developmental Studies Hybridoma Bank, Iowa City, IA, USA |
| Nkx2-2             | mouse      | 1: 500 (IF)                        | Developmental Studies Hybridoma Bank, Iowa City, IA, USA |
| Nkx6-1             | mouse      | 1:500 (IF)                         | Developmental Studies Hybridoma Bank, Iowa City, IA, USA |
| Pdx1               | guinea pig | 1:500 (IF)                         | Abcam, Cambridge, UK                                     |
| PHH3               | rabbit     | 1:200 (IF)                         | Millipore, Billerica, MA, USA                            |
| somatostatin       | rabbit     | 1:500 (IF)                         | DAKO, Glostrup, Denmark                                  |
| Sox9               | rabbit     | 1:2000 (IF)                        | Millipore, Billerica, MA, USA                            |
| Histone H3         | rabbit     | 1:1000 (WB)                        | Abcam, Cambridge, UK                                     |
| H3K9me2            | mouse      | 1 ug/ ChIP reaction<br>1:1000 (WB) | Abcam, Cambridge, UK                                     |
| H3K27me3           | rabbit     | 1 ug/ ChIP reaction                | Millipore, Billerica, MA, USA                            |
| H3K27me3           | mouse      | 1:500 (WB)                         | Abcam, Cambridge, UK                                     |
| RNAPII-Ser5p       | Mouse IgM  | 3ug/ ChIP reaction                 | Abcam, Cambridge, UK                                     |

| <b>SECONDARY ANTIBODIES</b>      | <b>RAISED IN</b> | <b>DILUTION</b>          | <b>SOURCE</b>                       |
|----------------------------------|------------------|--------------------------|-------------------------------------|
| Anti-mouseIgM                    | rabbit           | 4 ug / 20ul<br>dynabeads | Jackson ImmunoResearch, Suffolk, UK |
| Anti-mouse IgG peroxidase        | sheep            | 1/5000                   | GE Healthcare                       |
| Anti-rabbit IgG peroxidase       | donkey           | 1/5000                   | GE Healthcare                       |
| Cy2 anti-guinea pig              | donkey           | 1/500                    | Jackson ImmunoResearch, Suffolk, UK |
| Alexa Fluor® 488 anti-guinea pig | donkey           | 1/500                    | Jackson ImmunoResearch, Suffolk, UK |
| Alexa Fluor® 555 anti-guinea pig | donkey           | 1/250                    | Molecular Probes                    |
| Cy3 anti-guinea pig              | donkey           | 1/500                    | Jackson ImmunoResearch, Suffolk, UK |
| Alexa Fluor® 555 anti-mouse      | donkey           | 1/250                    | Molecular Probes                    |
| Cy3 anti-mouse                   | donkey           | 1/500                    | Jackson ImmunoResearch, Suffolk, UK |
| Alexa Fluor® 488 anti-rabbit     | donkey           | 1/500                    | Jackson ImmunoResearch, Suffolk, UK |
| Cy3 anti-rabbit                  | donkey           | 1/500                    | Jackson ImmunoResearch, Suffolk, UK |
| Alexa Fluor® 555 anti-rabbit     | mouse            | 1/250                    | Molecular Probes                    |
